# Supplementary material for: SARS-CoV-2–associated ssRNAs activate inflammation and immunity via TLR7/8
Source: PubMed Central journal article supplement (PMC8492321; doi:10.1172/jci.insight.150542), 2021-09-22
Supplement: jciinsight-6-150542-s083.pdf [file jciinsight-6-150542-s083.pdf]

A

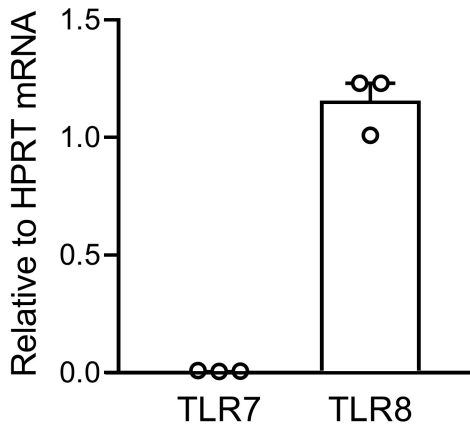

B

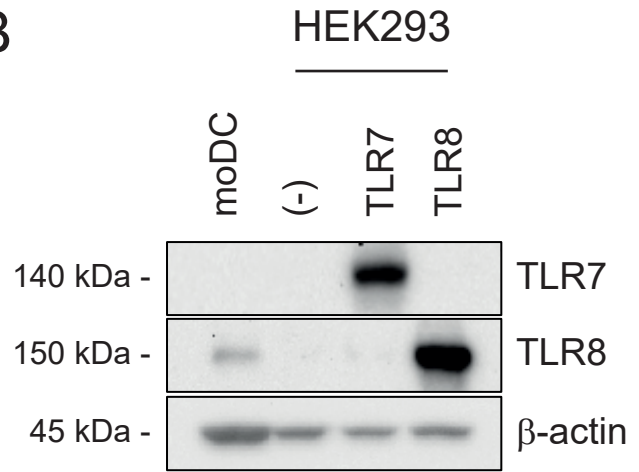

C

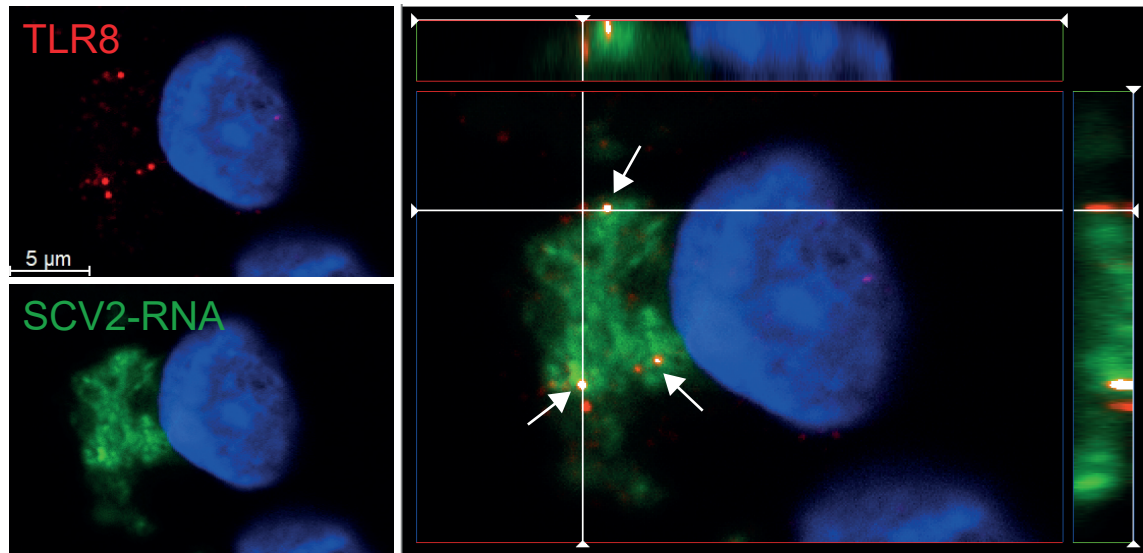

**Supplemental Figure 1. TLR8 expression and SAMP colocalization in moDCs.** (A) mRNA from moDCs at day 6 of culture was extracted to analyse the expression of TLR7 and TLR8 by qPCR. Data are expressed as mean  $\pm$  SEM (n=3) of  $2^{-\Delta Ct}$  relative to HPRT. (B) moDCs and HEK293 cells stably transfected with human TLR7, TLR8 or luciferase alone (-) were lysed and the expression of TLR7, TLR8 and  $\beta$ -actin was determined by Western blot. One representative fluorogram out of three is shown. (C) moDCs were stimulated with SCV2-RNA-Atto 488 for 15 minutes. After fixation and permeabilization, moDCs were stained with anti-TLR8 mAb (red) and DAPI (blue). Image on the right shows the orthogonal z reconstruction elaborated with AxioVision 3D. White dots correspond to TLR8 colocalizing with SCV2-RNA. This representative image depicts results obtained in one donor out of three; scale bar: 5  $\mu$ m.

A

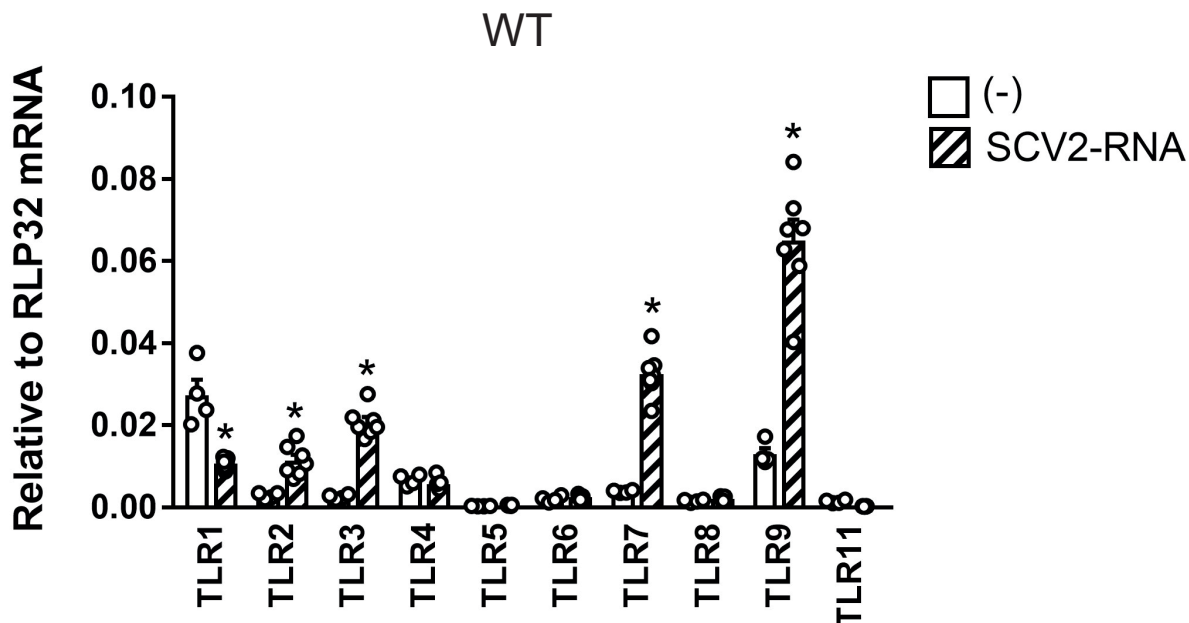

B

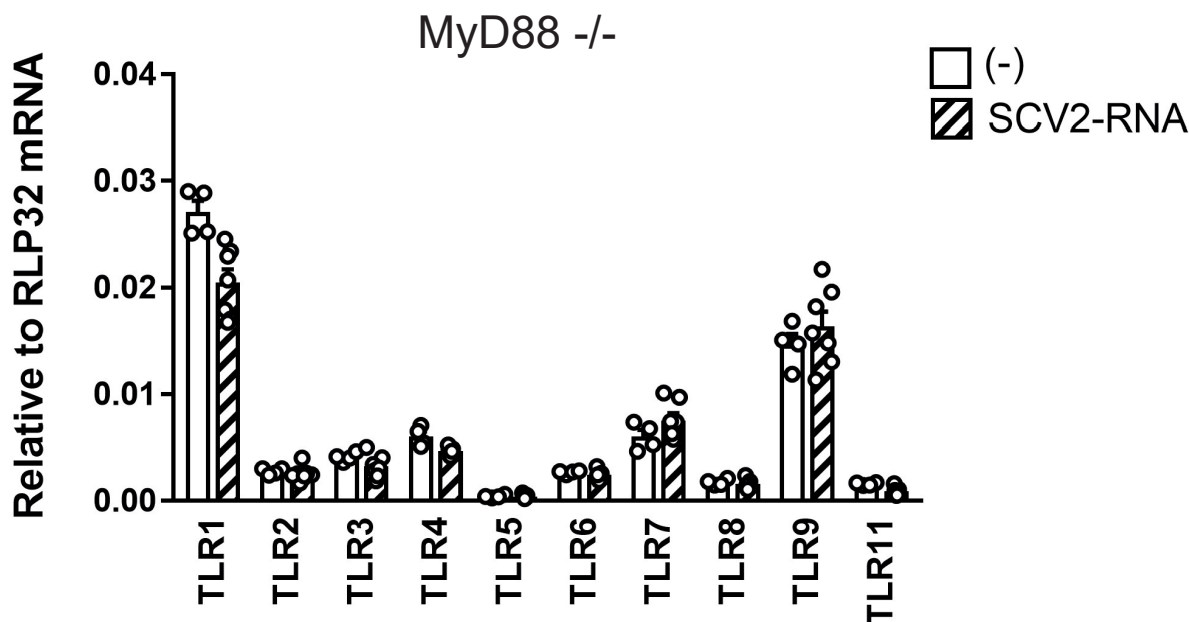

**Supplemental Figure 2. SCV2-RNA stimulation affects TLR expression in WT mice.** Expression of TLR mRNAs in splenocytes from WT (upper panel) or MyD88<sup>-/-</sup> mice (lower panel) stimulated with SCV2-RNA for 6 hours. Data are expressed as mean  $\pm$  SEM ((-) n=4, SCV2-RNA n=7) of  $2^{-\Delta Ct}$  relative to RPL32 of one representative experiment out of three. \*P < 0.05 versus respective “(-)” by paired Student’s *t* test.

Supplemental Table 1

| Sequence number | Sequence                      | Start | Stop |
|-----------------|-------------------------------|-------|------|
| 1               | TTTAAAATCT <b>TGTGT</b> GGCTG | 76    | 94   |
| 2               | TAAAATCT <b>TGTGT</b> GGCTGTC | 78    | 96   |
| 3               | <b>CTGTGT</b> GGCTGTCACTCGG   | 84    | 102  |
| 4               | TTGCCTTTGGAGGCT <b>TGTGT</b>  | 1476  | 1494 |
| 5               | TGCCTTTGGAGGCT <b>TGTGTG</b>  | 1477  | 1495 |
| 6               | GCCTTTGGAGGCT <b>TGTGTGT</b>  | 1478  | 1496 |
| 7               | CCTTTGGAGGCT <b>TGTGTGT</b> T | 1479  | 1497 |
| 8               | CTTTGGAGGCT <b>TGTGTGT</b> TC | 1480  | 1498 |
| 9               | TTTGGAGGCT <b>TGTGTGT</b> TCT | 1481  | 1499 |
| 10              | TGGAGGCT <b>TGTGTGT</b> TCTCT | 1483  | 1501 |
| 11              | GAGGCT <b>TGTGTGT</b> TCTCTTA | 1485  | 1503 |
| 12              | GGCT <b>TGTGTGT</b> TCTCTTATG | 1487  | 1505 |
| 13              | GCT <b>TGTGTGT</b> TCTCTTATGT | 1488  | 1506 |
| 14              | C <b>TGTGTGT</b> TCTCTTATGTT  | 1489  | 1507 |
| 15              | <b>TGTGTGT</b> TCTCTTATGTTG   | 1490  | 1508 |
| 16              | <b>GTGTGT</b> TCTCTTATGTTGG   | 1491  | 1509 |
| 17              | <b>TGTGT</b> TCTCTTATGTTGGT   | 1492  | 1510 |
| 18              | TAAATTTTGGCTT <b>TGTGT</b>    | 2314  | 2332 |
| 19              | AAATTTTGGCTT <b>TGTGTG</b>    | 2315  | 2333 |
| 20              | AATTTTGGCTT <b>TGTGTGC</b>    | 2316  | 2334 |
| 21              | ATTTTGGCTT <b>TGTGTGCT</b>    | 2317  | 2335 |
| 22              | TTTTGGCTT <b>TGTGTGCTG</b>    | 2318  | 2336 |
| 23              | TTTTGGCTT <b>TGTGTGCTGA</b>   | 2319  | 2337 |
| 24              | TTGGCTT <b>TGTGTGCTGACT</b>   | 2321  | 2339 |
| 25              | GGCTT <b>TGTGTGCTGACTCT</b>   | 2323  | 2341 |
| 26              | TT <b>TGTGTGCTGACTCTATC</b>   | 2326  | 2344 |
| 27              | <b>TGTGTGCTGACTCTATCAT</b>    | 2328  | 2346 |
| 28              | ATTGTACAGAAAG <b>TGTGT</b> T  | 2410  | 2428 |
| 29              | AATGAGTTCGCC <b>TGTGT</b> TG  | 2870  | 2888 |
| 30              | ATGAGTTCGCC <b>TGTGT</b> TGT  | 2871  | 2889 |
| 31              | TGAGTTCGCC <b>TGTGT</b> TGTG  | 2872  | 2890 |
| 32              | GAGTTCGCC <b>TGTGT</b> TGTGG  | 2873  | 2891 |
| 33              | GTTCCGCC <b>TGTGT</b> TGTGGCA | 2875  | 2893 |
| 34              | C <b>TGTGT</b> TGTGGCAGATGC   | 2880  | 2898 |
| 35              | <b>TGTGT</b> TGTGGCAGATGCTG   | 2882  | 2900 |
| 36              | AAGTGGGTGGTAGT <b>TGTGT</b>   | 3558  | 3576 |
| 37              | AGTGGGTGGTAGT <b>TGTGT</b> T  | 3559  | 3577 |
| 38              | GTGGGTGGTAGT <b>TGTGT</b> TT  | 3560  | 3578 |
| 39              | TGGGTGGTAGT <b>TGTGT</b> TTT  | 3561  | 3579 |
| 40              | GGGTGGTAGT <b>TGTGT</b> TTTA  | 3562  | 3580 |
| 41              | GGTGGTAGT <b>TGTGT</b> TTTAA  | 3563  | 3581 |
| 42              | GTGGTAGT <b>TGTGT</b> TTTAAG  | 3564  | 3582 |
| 43              | TGGTAGT <b>TGTGT</b> TTTAAGC  | 3565  | 3583 |
| 44              | GTAGT <b>TGTGT</b> TTTAAGCGG  | 3567  | 3585 |
| 45              | G <b>TGTGT</b> TTTAAGCGGACA   | 3570  | 3588 |
| 46              | ATTCTTTAAGAGTT <b>TGTGT</b>   | 3744  | 3762 |
| 47              | TTCTTTAAGAGTT <b>TGTGT</b> A  | 3745  | 3763 |
| 48              | CTTTAAGAGTT <b>TGTGT</b> AGA  | 3747  | 3765 |
| 49              | TTAAGAGTT <b>TGTGT</b> AGATA  | 3749  | 3767 |
| 50              | AAGAGTT <b>TGTGT</b> AGATACT  | 3751  | 3769 |
| 51              | GAGTT <b>TGTGT</b> AGATACTGT  | 3753  | 3771 |

Supplemental Table 1

|     |                                |       |       |
|-----|--------------------------------|-------|-------|
| 52  | AGTT <b>TGTGT</b> AGATACTGTT   | 3754  | 3772  |
| 53  | GTT <b>TGTGT</b> AGATACTGTTTC  | 3755  | 3773  |
| 54  | TT <b>TGTGT</b> AGATACTGTTTCG  | 3756  | 3774  |
| 55  | <b>TGTGT</b> AGATACTGTTTCGC    | 3757  | 3775  |
| 56  | ATTAATGCCTGTCT <b>TGTGTG</b>   | 4426  | 4444  |
| 57  | TAATGCCTGTCT <b>TGTGTG</b> GGA | 4428  | 4446  |
| 58  | ATGCCTGTCT <b>TGTGTG</b> GAAA  | 4430  | 4448  |
| 59  | GCCTGTCT <b>TGTGTG</b> GAAACT  | 4432  | 4450  |
| 60  | AGTCTTGAACGTGG <b>TGTGT</b>    | 5503  | 5521  |
| 61  | TCTTGAACGTGG <b>TGTGT</b> AA   | 5505  | 5523  |
| 62  | CGTGG <b>TGTGT</b> AAAACCTTGT  | 5512  | 5530  |
| 63  | GTGG <b>TGTGT</b> AAAACCTTGTG  | 5513  | 5531  |
| 64  | TGG <b>TGTGT</b> AAAACCTTGTGG  | 5514  | 5532  |
| 65  | GG <b>TGTGT</b> AAAACCTTGTGGA  | 5515  | 5533  |
| 66  | <b>TGTGT</b> AAAACCTTGTGGAC    | 5516  | 5534  |
| 67  | TTTATTGCTACAAT <b>TGTGT</b>    | 6787  | 6805  |
| 68  | TTATTGCTACAAT <b>TGTGT</b> A   | 6788  | 6806  |
| 69  | ATCAACTTGTATGAT <b>TGTGT</b>   | 7483  | 7501  |
| 70  | CAACTTGTATGAT <b>TGTGT</b> TA  | 7485  | 7503  |
| 71  | AATTGGAAT <b>TGTGT</b> TAATT   | 7610  | 7628  |
| 72  | TTGGAAT <b>TGTGT</b> TAATTGT   | 7612  | 7630  |
| 73  | GGAAT <b>TGTGT</b> TAATTGTGA   | 7614  | 7632  |
| 74  | GAAT <b>TGTGT</b> TAATTGTGAT   | 7615  | 7633  |
| 75  | AAT <b>TGTGT</b> TAATTGTGATA   | 7616  | 7634  |
| 76  | ATT <b>TGTGT</b> TAATTGTGATAC  | 7617  | 7635  |
| 77  | <b>TGTGT</b> TAATTGTGATACAT    | 7619  | 7637  |
| 78  | TTAAAGTTACACT <b>TGTGT</b> T   | 8586  | 8604  |
| 79  | TTACACT <b>TGTGT</b> TCCTTTT   | 8592  | 8610  |
| 80  | ACACT <b>TGTGT</b> TCCTTTTGT   | 8594  | 8612  |
| 81  | CACT <b>TGTGT</b> TCCTTTTGT    | 8595  | 8613  |
| 82  | ACT <b>TGTGT</b> TCCTTTTGT     | 8596  | 8614  |
| 83  | CT <b>TGTGT</b> TCCTTTTGTG     | 8597  | 8615  |
| 84  | <b>TGTGT</b> TCCTTTTGTGCT      | 8598  | 8616  |
| 85  | <b>TGTGT</b> TCCTTTTGTGCT      | 8599  | 8617  |
| 86  | ACATCAGCT <b>TGTGT</b> TTTGG   | 8993  | 9011  |
| 87  | ATCAGCT <b>TGTGT</b> TTTGGCT   | 8995  | 9013  |
| 88  | CAGCT <b>TGTGT</b> TTTGGCTGC   | 8997  | 9015  |
| 89  | AGCT <b>TGTGT</b> TTTGGCTGCT   | 8998  | 9016  |
| 90  | GCT <b>TGTGT</b> TTTGGCTGCTG   | 8999  | 9017  |
| 91  | CT <b>TGTGT</b> TTTGGCTGCTGA   | 9000  | 9018  |
| 92  | <b>TGTGT</b> TTTGGCTGCTGAA     | 9001  | 9019  |
| 93  | <b>TGTGT</b> TTTGGCTGCTGAAT    | 9002  | 9020  |
| 94  | AGAAGCTGGTGT <b>TGTGT</b> A    | 9241  | 9259  |
| 95  | AAGCTGGTGT <b>TGTGT</b> ATC    | 9243  | 9261  |
| 96  | GCTGGTGT <b>TGTGT</b> ATCTA    | 9245  | 9263  |
| 97  | TGGTGT <b>TGTGT</b> ATCTACT    | 9247  | 9265  |
| 98  | GTGT <b>TGTGT</b> ATCTACTAG    | 9249  | 9267  |
| 99  | GTT <b>TGTGT</b> ATCTACTAGTG   | 9251  | 9269  |
| 100 | TT <b>TGTGT</b> ATCTACTAGTGG   | 9252  | 9270  |
| 101 | <b>TGTGT</b> ATCTACTAGTGGT     | 9253  | 9271  |
| 102 | <b>TGTGT</b> ATCTACTAGTGGTA    | 9254  | 9272  |
| 103 | TAGATTATGACT <b>TGTGT</b> CTC  | 10509 | 10527 |
| 104 | GATTATGACT <b>TGTGT</b> CTCTT  | 10511 | 10529 |

Supplemental Table 1

|     |                                |       |       |
|-----|--------------------------------|-------|-------|
| 105 | TTATGACT <b>TGTGT</b> CTCTTTTT | 10513 | 10531 |
| 106 | ATGACT <b>TGTGT</b> CTCTTTTTTG | 10515 | 10533 |
| 107 | TGACT <b>TGTGT</b> CTCTTTTTGT  | 10516 | 10534 |
| 108 | GACT <b>TGTGT</b> CTCTTTTTGTT  | 10517 | 10535 |
| 109 | ACT <b>TGTGT</b> CTCTTTTTGTTA  | 10518 | 10536 |
| 110 | CT <b>TGTGT</b> CTCTTTTTGTTAC  | 10519 | 10537 |
| 111 | <b>TGTGT</b> CTCTTTTTGTTACA    | 10520 | 10538 |
| 112 | TGCCGTTTTAGATA <b>TGTGT</b>    | 10831 | 10849 |
| 113 | GCCGTTTTAGATA <b>TGTGTG</b>    | 10832 | 10850 |
| 114 | CCGTTTTAGATA <b>TGTGTGC</b>    | 10833 | 10851 |
| 115 | CGTTTTAGATA <b>TGTGTGCT</b>    | 10834 | 10852 |
| 116 | GTTTTAGATA <b>TGTGTGCTT</b>    | 10835 | 10853 |
| 117 | TTTTAGATA <b>TGTGTGCTTC</b>    | 10836 | 10854 |
| 118 | TTAGATA <b>TGTGTGCTTCAT</b>    | 10838 | 10856 |
| 119 | AGATA <b>TGTGTGCTTCATTA</b>    | 10840 | 10858 |
| 120 | ACT <b>TGTGT</b> TATGTATGCATC  | 11307 | 11325 |
| 121 | <b>TGTGT</b> TATGTATGCATCAG    | 11309 | 11327 |
| 122 | AGA <b>ACTGTGT</b> ATGATGATG   | 11357 | 11375 |
| 123 | AACT <b>TGTGT</b> ATGATGATGGT  | 11359 | 11377 |
| 124 | ACT <b>TGTGT</b> ATGATGATGGTG  | 11360 | 11378 |
| 125 | CT <b>TGTGT</b> ATGATGATGGTGC  | 11361 | 11379 |
| 126 | <b>TGTGT</b> ATGATGATGGTGCT    | 11362 | 11380 |
| 127 | AGG <b>TATTGTTTTTATGTGT</b>    | 11533 | 11551 |
| 128 | GG <b>TATTGTTTTTATGTGTG</b>    | 11534 | 11552 |
| 129 | GT <b>TATTGTTTTTATGTGTGT</b>   | 11535 | 11553 |
| 130 | T <b>ATTGTTTTTATGTGTGTT</b>    | 11536 | 11554 |
| 131 | AT <b>TGTTTTTATGTGTGTTG</b>    | 11537 | 11555 |
| 132 | TT <b>GTTTTTATGTGTGTTGA</b>    | 11538 | 11556 |
| 133 | T <b>GTTTTTATGTGTGTTGAG</b>    | 11539 | 11557 |
| 134 | G <b>TTTTTATGTGTGTTGAGT</b>    | 11540 | 11558 |
| 135 | TT <b>TTATGTGTGTTGAGTAT</b>    | 11542 | 11560 |
| 136 | TT <b>TATGTGTGTTGAGTATT</b>    | 11543 | 11561 |
| 137 | TT <b>ATGTGTGTTGAGTATTG</b>    | 11544 | 11562 |
| 138 | T <b>ATGTGTGTTGAGTATTGC</b>    | 11545 | 11563 |
| 139 | <b>TGTGTGTTGAGTATTGCC</b>      | 11547 | 11565 |
| 140 | <b>TGTGTTGAGTATTGCCCTA</b>     | 11549 | 11567 |
| 141 | ATTGTGGGCTCA <b>ATGTGTC</b>    | 11923 | 11941 |
| 142 | TTGTGGGCTCA <b>ATGTGTCC</b>    | 11924 | 11942 |
| 143 | TGTGGGCTCA <b>ATGTGTCCA</b>    | 11925 | 11943 |
| 144 | TGGGCTCA <b>ATGTGTCCAGT</b>    | 11927 | 11945 |
| 145 | TGCAAGAGATGG <b>TTGTGTT</b>    | 12418 | 12436 |
| 146 | AGATGG <b>TTGTGTTCCCTTG</b>    | 12424 | 12442 |
| 147 | ATGG <b>TTGTGTTCCCTTGAA</b>    | 12426 | 12444 |
| 148 | G <b>TTGTGTTCCCTTGAACAT</b>    | 12429 | 12447 |
| 149 | CTA <b>ATTGTGTTAAGATGTT</b>    | 13140 | 13158 |
| 150 | TA <b>ATTGTGTTAAGATGTTG</b>    | 13141 | 13159 |
| 151 | AA <b>TTGTGTTAAGATGTTGT</b>    | 13142 | 13160 |
| 152 | AT <b>TTGTGTTAAGATGTTGTG</b>   | 13143 | 13161 |
| 153 | <b>TTGTGTTAAGATGTTGTGT</b>     | 13144 | 13162 |
| 154 | <b>TGTGTTAAGATGTTGTGTA</b>     | 13145 | 13163 |
| 155 | GTG <b>TTAAGATGTTGTGTAC</b>    | 13146 | 13163 |
| 156 | AA <b>TTGTGTTAACTGTTTGG</b>    | 14329 | 14347 |
| 157 | AT <b>TTGTGTTAACTGTTTGG</b>    | 14330 | 14348 |

Supplemental Table 1

|     |                               |       |       |
|-----|-------------------------------|-------|-------|
| 158 | <u>TTGTGT</u> TAACTGTTTGGAT   | 14331 | 14349 |
| 159 | <u>TGTGT</u> TAACTGTTTGGATG   | 14332 | 14350 |
| 160 | TTTAAGGAATTACT <u>TGTGT</u>   | 14542 | 14560 |
| 161 | GGAATTACT <u>TGTGT</u> ATGCT  | 14547 | 14565 |
| 162 | AATTACT <u>TGTGT</u> ATGCTGC  | 14549 | 14567 |
| 163 | TTACT <u>TGTGT</u> ATGCTGCTG  | 14551 | 14569 |
| 164 | ACT <u>TGTGT</u> ATGCTGCTGAC  | 14553 | 14571 |
| 165 | TTCTATGACTTTGCT <u>TGTGT</u>  | 14695 | 14713 |
| 166 | CTATGACTTTGCT <u>TGTGT</u> CT | 14697 | 14715 |
| 167 | TGACTTTGCT <u>TGTGT</u> CTAAG | 14700 | 14718 |
| 168 | ACTTTGCT <u>TGTGT</u> CTAAGGG | 14702 | 14720 |
| 169 | TTTGCT <u>TGTGT</u> CTAAGGGTT | 14704 | 14722 |
| 170 | TTGCT <u>TGTGT</u> CTAAGGGTTT | 14705 | 14723 |
| 171 | TGCT <u>TGTGT</u> CTAAGGGTTTC | 14706 | 14724 |
| 172 | GCT <u>TGTGT</u> CTAAGGGTTTCT | 14707 | 14725 |
| 173 | C <u>TGTGT</u> CTAAGGGTTTCTT  | 14708 | 14726 |
| 174 | <u>TGTGT</u> CTAAGGGTTTCTTT   | 14709 | 14727 |
| 175 | GTGAAATGGTCAT <u>TGTGT</u> GG | 15431 | 15449 |
| 176 | AAATGGTCAT <u>TGTGT</u> GGCGG | 15434 | 15452 |
| 177 | ATGGTCAT <u>TGTGT</u> GGCGGTT | 15436 | 15454 |
| 178 | GGTCAT <u>TGTGT</u> GGCGGTTCA | 15438 | 15456 |
| 179 | TCTGACGATGCTGT <u>TGTGT</u>   | 15715 | 15733 |
| 180 | CTGACGATGCTGT <u>TGTGT</u> G  | 15716 | 15734 |
| 181 | TGACGATGCTGT <u>TGTGT</u> G   | 15717 | 15735 |
| 182 | GACGATGCTGT <u>TGTGT</u> GTT  | 15718 | 15736 |
| 183 | ACGATGCTGT <u>TGTGT</u> GTTT  | 15719 | 15737 |
| 184 | CGATGCTGT <u>TGTGT</u> GTTTC  | 15720 | 15738 |
| 185 | ATGCTGT <u>TGTGT</u> GTTTCAA  | 15722 | 15740 |
| 186 | GCTGT <u>TGTGT</u> GTTTCAATA  | 15724 | 15742 |
| 187 | TGT <u>TGTGT</u> GTTTCAATAGC  | 15726 | 15744 |
| 188 | <u>GTGTGT</u> TTCATAGCACTT    | 15730 | 15748 |
| 189 | CAGGGTGATGATTAT <u>TGTGT</u>  | 15904 | 15922 |
| 190 | AGGGTGATGATTAT <u>TGTGT</u> A | 15905 | 15923 |
| 191 | GGGTGATGATTAT <u>TGTGT</u> AC | 15906 | 15924 |
| 192 | GGTGATGATTAT <u>TGTGT</u> ACC | 15907 | 15925 |
| 193 | TGATGATTAT <u>TGTGT</u> ACCTT | 15909 | 15927 |
| 194 | GATTAT <u>TGTGT</u> ACCTTCCTT | 15913 | 15931 |
| 195 | AGGCTGTTGGGGCT <u>TGTGT</u>   | 16235 | 16253 |
| 196 | GGCTGTTGGGGCT <u>TGTGT</u> T  | 16236 | 16254 |
| 197 | GCTGTTGGGGCT <u>TGTGT</u> TTC | 16237 | 16255 |
| 198 | CTGTTGGGGCT <u>TGTGT</u> TCT  | 16238 | 16256 |
| 199 | TGTTGGGGCT <u>TGTGT</u> TCTT  | 16239 | 16257 |
| 200 | GTTGGGGCT <u>TGTGT</u> TCTTT  | 16240 | 16258 |
| 201 | TTGGGGCT <u>TGTGT</u> TCTTTG  | 16241 | 16259 |
| 202 | TGGGGCT <u>TGTGT</u> TCTTTGC  | 16242 | 16260 |
| 203 | GGGCT <u>TGTGT</u> TCTTTGCAA  | 16244 | 16262 |
| 204 | GGCT <u>TGTGT</u> TCTTTGCAAT  | 16245 | 16263 |
| 205 | GCT <u>TGTGT</u> TCTTTGCAATT  | 16246 | 16264 |
| 206 | CT <u>TGTGT</u> TCTTTGCAATTC  | 16247 | 16265 |
| 207 | CATTAGTTTTCCATT <u>TGTGT</u>  | 16470 | 16488 |
| 208 | ATTAGTTTTCCATT <u>TGTGT</u> G | 16471 | 16489 |
| 209 | TTAGTTTTCCATT <u>TGTGT</u> GC | 16472 | 16490 |
| 210 | TAGTTTTCCATT <u>TGTGT</u> GCT | 16473 | 16491 |

Supplemental Table 1

|     |                               |       |       |
|-----|-------------------------------|-------|-------|
| 211 | GTTTTCCATT <b>TGTGT</b> GCTAA | 16475 | 16493 |
| 212 | TTTCCATT <b>TGTGT</b> GCTAATG | 16477 | 16495 |
| 213 | TCCATT <b>TGTGT</b> GCTAATGGA | 16479 | 16497 |
| 214 | <b>TGTGT</b> TGGTAGCGATAATG   | 16525 | 16543 |
| 215 | TTTCAATTCAG <b>TGTGT</b> AGA  | 17499 | 17517 |
| 216 | TTCAG <b>TGTGT</b> AGACTTATG  | 17505 | 17523 |
| 217 | CTGAAGGTTTAT <b>TGTGT</b> TGA | 18143 | 18161 |
| 218 | GAAGGTTTAT <b>TGTGT</b> TGACA | 18145 | 18163 |
| 219 | AGGTTTAT <b>TGTGT</b> TGACATA | 18147 | 18165 |
| 220 | TAT <b>TGTGT</b> TGACATACCTGG | 18152 | 18170 |
| 221 | AGGTTTCATCTAAG <b>TGTGTG</b>  | 20475 | 20493 |
| 222 | GGTTCATCTAAG <b>TGTGTGT</b>   | 20476 | 20494 |
| 223 | GTTTCATCTAAG <b>TGTGTGTG</b>  | 20477 | 20495 |
| 224 | TCATCTAAG <b>TGTGTGTGT</b> T  | 20479 | 20497 |
| 225 | ATCTAAG <b>TGTGTGTGT</b> TCT  | 20481 | 20499 |
| 226 | CTAAG <b>TGTGTGTGT</b> TCTGT  | 20483 | 20501 |
| 227 | AAG <b>TGTGTGTGT</b> TCTGTTA  | 20485 | 20503 |
| 228 | AG <b>TGTGTGTGT</b> TCTGTATT  | 20486 | 20504 |
| 229 | <b>TGTGTGTG</b> TCTGTATT      | 20487 | 20505 |
| 230 | <b>TGTGTGT</b> TCTGTATTG      | 20488 | 20506 |
| 231 | <b>TGTGTGT</b> TCTGTATTGA     | 20489 | 20507 |
| 232 | <b>TGTGTGT</b> TCTGTATTGAT    | 20490 | 20508 |
| 233 | <b>TGTGT</b> TCTGTATTGATT     | 20491 | 20509 |
| 234 | <b>TGTGT</b> TCTGTATTGATTT    | 20492 | 20510 |
| 235 | AGTCTCTAGTCAG <b>TGTGT</b> T  | 21592 | 21610 |
| 236 | TCTCTAGTCAG <b>TGTGT</b> TAA  | 21594 | 21612 |
| 237 | TCTAGTCAG <b>TGTGT</b> TAATC  | 21596 | 21614 |
| 238 | TAGTCAG <b>TGTGT</b> TAATCTT  | 21598 | 21616 |
| 239 | ATCTTAGGGAATTT <b>TGTGT</b> T | 22125 | 22143 |
| 240 | TCTTAGGGAATTT <b>TGTGT</b> TT | 22126 | 22144 |
| 241 | CTTAGGGAATTT <b>TGTGT</b> TTA | 22127 | 22145 |
| 242 | TAGGGAATTT <b>TGTGT</b> TTAAG | 22129 | 22147 |
| 243 | GGGAATTT <b>TGTGT</b> TTAAGAA | 22131 | 22149 |
| 244 | ATTT <b>TGTGT</b> TTAAGAATATT | 22135 | 22153 |
| 245 | TT <b>TGTGT</b> TTAAGAATATTG  | 22136 | 22154 |
| 246 | TT <b>TGTGT</b> TTAAGAATATTGA | 22137 | 22155 |
| 247 | <b>TGTGT</b> TTAAGAATATTGAT   | 22138 | 22156 |
| 248 | <b>CTGTGT</b> TGCTGATTATTCT   | 22642 | 22660 |
| 249 | <b>TGTGT</b> TGCTGATTATTCTG   | 22643 | 22661 |
| 250 | ATGTCAGAG <b>TGTGT</b> ACTTG  | 24647 | 24665 |
| 251 | GTCAGAG <b>TGTGT</b> ACTTGGA  | 24649 | 24667 |
| 252 | ACATTT <b>TGTGT</b> CTGGTAACT | 24920 | 24938 |
| 253 | ATTT <b>TGTGT</b> CTGGTAACTGT | 24922 | 24940 |
| 254 | TT <b>TGTGT</b> CTGGTAACTGTG  | 24923 | 24941 |
| 255 | TT <b>TGTGT</b> CTGGTAACTGTGA | 24924 | 24942 |
| 256 | <b>TGTGT</b> CTGGTAACTGTGAT   | 24925 | 24943 |
| 257 | TGGAGTAAAAGACT <b>TGTGT</b> T | 25977 | 25995 |
| 258 | GAGTAAAAGACT <b>TGTGT</b> TGT | 25979 | 25997 |
| 259 | GAAAAGACT <b>TGTGT</b> TGTAT  | 25981 | 25999 |
| 260 | <b>TGTGT</b> TGTATTACACAGTT   | 25990 | 26008 |
| 261 | ACTGCGCTTCGATT <b>TGTGTG</b>  | 26347 | 26365 |
| 262 | CTGCGCTTCGATT <b>TGTGTG</b> C | 26348 | 26366 |
| 263 | TGCGCTTCGATT <b>TGTGTG</b> CG | 26349 | 26367 |

Supplemental Table 1

|     |                               |       |       |
|-----|-------------------------------|-------|-------|
| 264 | CGCTTCGATT <b>TGTGT</b> GCGTA | 26351 | 26369 |
| 265 | CTTCGATT <b>TGTGT</b> GCGTACT | 26353 | 26371 |
| 266 | TCGATT <b>TGTGT</b> GCGTACTGC | 26355 | 26373 |
| 267 | GATT <b>TGTGT</b> GCGTACTGCTG | 26357 | 26375 |
| 268 | <b>TGTGT</b> GCGTACTGCTGCA    | 26359 | 26377 |
| 269 | CCAAGAG <b>TGTGT</b> TAGAGGT  | 27453 | 27471 |
| 270 | AG <b>TGTGT</b> AACATTAGGGAG  | 29687 | 29705 |
| 271 | <b>GTGTGT</b> AACATTAGGGAGG   | 29688 | 29706 |

**Supplemental Table 1****List of SARS-CoV-2 GU-rich sequences enriched in Interferon Induction Motif (IIM)**

The reference SARS-CoV-2 genome (NC\_045512, positive strand) was scanned for GU-rich ssRNA as explained in Material and Methods. Within the identified 491 GU-rich sequences, 271 were further selected based on their content of at least one "UGUGU" Interferon Induction Motif (IIM). Base numbering is based on the SARS-CoV-2 reference genome NC\_045512.



| Gene Name                       | Species | Primer Sequence (5'-3') |                                                       |
|---------------------------------|---------|-------------------------|-------------------------------------------------------|
| <b>RPL32</b>                    | mouse   | Forward<br>Reverse      | GCTGCCATCTGTTTTACGG<br>TGACTGGTGCCTGATGAACT           |
| <b>TLR1</b>                     | mouse   | Forward<br>Reverse      | CTGTCTTCAGATGCTTACCTCC<br>GGATGCTACATTGAGTTCCTGC      |
| <b>TLR2</b>                     | mouse   | Forward<br>Reverse      | CAGCTCACCGATGAAGAAGCTG<br>GAACTCTACCTCCGACAGTTCC      |
| <b>TLR3</b>                     | mouse   | Forward<br>Reverse      | CGAACCTGACAGAACTCGATC<br>TTGGAGGTTCTCCAGTTGGAC        |
| <b>TLR4</b>                     | mouse   | Forward<br>Reverse      | CACGTCCATCGGTTGATCTTGG<br>AGTCCTTCCATGATAGAGGGTTC     |
| <b>TLR5</b>                     | mouse   | Forward<br>Reverse      | TGCTAACAAAGCTGACCGTGCTC<br>TTCACAGTTGCAGACGAACTCG     |
| <b>TLR6</b>                     | mouse   | Forward<br>Reverse      | GAGCTGAGAGTTCTGAGACTC<br>CCGATTGTGTGAGACATCCAG        |
| <b>TLR7</b>                     | mouse   | Forward<br>Reverse      | TGATCCTGGCCTATCTCTGAC<br>CGTGTCCACATCGAAAACAC         |
| <b>TLR8</b>                     | mouse   | Forward<br>Reverse      | TGGCATTACACCCTCACAGAG<br>CATTCCACAAACGGTCAAGACG       |
| <b>TLR9</b>                     | mouse   | Forward<br>Reverse      | CATCACCTGAGCCATCTGGAAG<br>GAGGTTGACCAGACCTTGGAACT     |
| <b>TLR11</b>                    | mouse   | Forward<br>Reverse      | TCTCACCAAGTTTCATTCTGCTGC<br>GAGTGTCCAGAGGTGATGAAGC    |
| <b>TNF-<math>\alpha</math></b>  | mouse   | Forward<br>Reverse      | TGCCTATGTCTCAGCCTCTTC<br>GAGGCCATTTGGGAACTTCT         |
| <b>IL-1<math>\beta</math></b>   | mouse   | Forward<br>Reverse      | TGTAATGAAAGACGGCACACC<br>TCTTCTTTGGGTATTGCTTGG        |
| <b>IL-6</b>                     | mouse   | Forward<br>Reverse      | GCTACCAAAGTGGATATAATCAGGA<br>CCAGGTAGCTATGGTACTCCAGAA |
| <b>IFN-<math>\alpha</math>4</b> | mouse   | Forward<br>Reverse      | TCAAGCCATCCTTGTGCTAA<br>GTCTTTTGTGATGTAAGAGGTT        |
| <b>IFN-<math>\gamma</math></b>  | mouse   | Forward<br>Reverse      | ATCTGGAGGAACTGGCAAAA<br>TTCAAGACTTCAAAGAGTCTGAGGTA    |
| <b>CCL3</b>                     | mouse   | Forward<br>Reverse      | TGCCTGCTGCTTCTCCTACAGC<br>CCCAGGTCTCTTTGGAGTCAGC      |
| <b>CCL4</b>                     | mouse   | Forward<br>Reverse      | TGTGCTCCAGGGTTCTCAGCAC<br>GGTTAGCACAGATCTGTCTGC       |
| <b>CCL20</b>                    | mouse   | Forward<br>Reverse      | AAGTGGGTGAAAAGGGCTGT<br>GTCCAATTCCATCCCAAAA           |
| <b>CCL22</b>                    | mouse   | Forward<br>Reverse      | TCTTGCTGTGGCAATTCAGA<br>GAGGGTGACGGATGTAGTCC          |
| <b>CXCL10</b>                   | mouse   | Forward<br>Reverse      | CGTCATTTTCTGCCTCATCCTG<br>CCGTCATCGATATGGATGCAGT      |
| <b>TRAIL</b>                    | mouse   | Forward<br>Reverse      | CTCACATTACTGGGATCACTCG<br>CTCCCAGGATTCAATCTTCTGG      |
| <b>Granzyme B</b>               | mouse   | Forward<br>Reverse      | CCCAAAGACCAAACGTGCTTCC<br>AAGCACGTGGAGGTGAACCATC      |
| <b>HPRT</b>                     | human   | Forward<br>Reverse      | CCAGTCAACAGGGGACATAAA<br>CACAATCAAGACATTCTTCCAGT      |

|                    |       |                    |                                               |
|--------------------|-------|--------------------|-----------------------------------------------|
| <b><i>TLR7</i></b> | human | Forward<br>Reverse | TTAACCAATTGCTTCCGTGTC<br>GGTGCCACACTCAATCTG   |
| <b><i>TLR8</i></b> | human | Forward<br>Reverse | TGTGGTTGTTTTCTGGATTCAA<br>GCTCGCATGGCTTACATGA |

**Supplemental Table 2.** Primer list used for qPCR.
